# Supplementary material for: On the Equivalence and Performance of Distributionally Robust Optimization and Robust Satisficing Models
Source: Atypon-hosted journal article supplement (doi:10.1287/msom.2023.0531), 2025-04-29
Supplement: msom.2023.0531.sm1.pdf [file msom.2023.0531.sm1.pdf]

# On the Equivalence and Performance of Distributionally Robust Optimization and Robust Satisficing Models

Zhiyuan Wang, Lun Ran, Minglong Zhou\*, Long He

## Appendix. Proofs and Details

### A. Proofs

*Proof of Proposition 1* If the optimal solution to the problem  $DRO(\theta)$  is  $(\mathbf{x}^*, k^*, \tau^*)$ , then fixing  $\tau = \tau^*$ ,  $(\mathbf{x}^*, k^*)$  will be the optimal solution to the problem  $RS(\tau^*)$  since the constraints of both models share the same and their objective is to minimize  $k$ .  $\square$

*Proof of Theorem 1* We begin by discussing the boundary cases separately. When  $\tau_{rs} = Z_0$ , we first show that the problem  $RS(Z_0)$  and  $DRO(0)$  have the same optimal solution  $\mathbf{x}^*$ , where  $\mathbf{x}^* = \arg \min_{\mathbf{x} \in \mathcal{X}} \frac{1}{S} \sum_{s \in [S]} f(\mathbf{x}, \hat{\mathbf{z}}_s)$ . The first constraint in the problem  $RS(Z_0)$  becomes  $\frac{1}{S} \sum_{s \in [S]} \sup_{z \in \mathcal{Z}} \{f(\mathbf{x}, z) - k\rho(z, \hat{\mathbf{z}}_s)\} \leq Z_0$ . There also exists the inequality  $\frac{1}{S} \sum_{s \in [S]} \sup_{z \in \mathcal{Z}} \{f(\mathbf{x}, z) - k\rho(z, \hat{\mathbf{z}}_s)\} \geq \frac{1}{S} \sum_{s \in [S]} f(\mathbf{x}, \hat{\mathbf{z}}_s) \geq Z_0$  where the equality holds only when  $\mathbf{x} = \mathbf{x}^*$ . Thus,  $\mathbf{x}^*$  is the optimal solution to the problem  $RS(Z_0)$ . For the problem  $DRO(0)$ , it reduces to the empirical optimization, and, by definition, its optimal solution is also  $\mathbf{x}^*$ .

When  $\tau_{rs} = \bar{\tau}$ , we have  $k^*(\tau_{rs}) = 0$  since all constraints could hold when  $k(\tau_{rs}) = 0$ . Simply let  $\bar{\theta} = \frac{1}{S} \sum_{s \in [S]} \sup_{z \in \mathcal{Z}} \{\rho(z, \hat{\mathbf{z}}_s)\}$  which means there is no distance restriction on the distribution, then the problem  $DRO(\bar{\theta})$  becomes  $\min_{\mathbf{x} \in \mathcal{X}} \sup_{z \in \mathcal{Z}} f(\mathbf{x}, z)$  and the problem  $RS(\bar{\tau})$  becomes

$$\begin{aligned} \min_{\mathbf{x} \in \mathcal{X}} \quad & 0 \\ \text{s.t.} \quad & \sup_{z \in \mathcal{Z}} f(\mathbf{x}, z) \leq \bar{\tau} \end{aligned}$$

Since  $\bar{\tau} = \inf_{\mathbf{x} \in \mathcal{X}} \sup_{z \in \mathcal{Z}} f(\mathbf{x}, z)$ , both problems have the same optimal solutions.

Next, we investigate the case for  $\tau_{rs} \in (Z_0, \bar{\tau})$ . We first define  $k^*(\tau)$  as the optimal value of the problem  $RS(\tau)$  and  $g(\tau, \theta) = \tau + k^*(\tau)\theta$ . Then we can rewrite the problem (DRO) as:  $\min_{\tau \geq Z_0} g(\tau, \theta)$ . We provide the following lemma on the convexity of  $k^*(\tau)$ .

LEMMA 1.  $k^*(\tau)$  is convex if the function  $f(\mathbf{x}, \mathbf{z})$  is convex over  $\mathbf{x}$ .

*Proof* Suppose that  $(\mathbf{x}_1, k_1)$  and  $(\mathbf{x}_2, k_2)$  are the minimizer of the problem  $RS(\tau_1)$  and  $RS(\tau_2)$  where  $\tau_1 \geq Z_0, \tau_2 \geq Z_0$ . We claim that  $(\lambda\mathbf{x}_1 + (1-\lambda)\mathbf{x}_2, \lambda k_1 + (1-\lambda)k_2)$  is a feasible solution of the problem  $RS(\lambda\tau_1 + (1-\lambda)\tau_2)$  for any  $\lambda \in [0, 1]$ . To see this, we have

$$\begin{aligned} & \frac{1}{S} \sum_{s \in [S]} \sup_{z \in \mathcal{Z}} \{f(\lambda\mathbf{x}_1 + (1-\lambda)\mathbf{x}_2, z) - (\lambda k_1 + (1-\lambda)k_2)\rho(z, \hat{\mathbf{z}}_s)\} \\ & \leq \frac{1}{S} \sum_{s \in [S]} \sup_{z \in \mathcal{Z}} \{\lambda[f(\mathbf{x}_1, z) - k_1\rho(z, \hat{\mathbf{z}}_s)] + (1-\lambda)[f(\mathbf{x}_2, z) - k_2\rho(z, \hat{\mathbf{z}}_s)]\} \\ & \leq \lambda \frac{1}{S} \sum_{s \in [S]} \sup_{z \in \mathcal{Z}} \{f(\mathbf{x}_1, z) - k_1\rho(z, \hat{\mathbf{z}}_s)\} + (1-\lambda) \frac{1}{S} \sum_{s \in [S]} \sup_{z \in \mathcal{Z}} \{f(\mathbf{x}_2, z) - k_2\rho(z, \hat{\mathbf{z}}_s)\} \\ & \leq \lambda\tau_1 + (1-\lambda)\tau_2 \end{aligned}$$

where the first inequality holds since the convexity of the function  $f(\mathbf{x}, \mathbf{z})$ , and the third holds because of the assumption of  $(\mathbf{x}_1, k_1)$  and  $(\mathbf{x}_2, k_2)$ . Moreover, due to the convexity of set  $\mathcal{X}$ , we also have  $\lambda\mathbf{x}_1 + (1-\lambda)\mathbf{x}_2 \in \mathcal{X}$ . Because  $k^*(\lambda\tau_1 + (1-\lambda)\tau_2)$  is an optimal solution, we have  $k^*(\lambda\tau_1 + (1-\lambda)\tau_2) \leq \lambda k_1 + (1-\lambda)k_2 = \lambda k^*(\tau_1) + (1-\lambda)k^*(\tau_2)$ . Thus  $k^*(\tau)$  is convex.  $\square$

When  $\tau_{rs} \in (Z_0, \bar{\tau})$ , from the above lemma, we know that  $k^*(\tau_{rs})$  is finite that there exist feasible solutions of  $RS(\tau_{rs})$  whenever  $\tau_{rs} \geq Z_0$ . In addition,  $\tau_{rs} \in \text{int}(\text{dom } k^*)$ , so we have that  $\partial k^*(\tau_{rs})$  is nonempty and bounded.

Next, we show that  $0 \notin \partial k^*(\tau_{rs})$  for any  $\tau_{rs} \in (Z_0, \bar{\tau})$ . If there exists  $\hat{\tau} \in (Z_0, \bar{\tau})$  such that  $0 \in \partial k^*(\hat{\tau})$ , then  $\hat{\tau}$  is the minimizer of  $k^*(\tau)$  and  $k^*(\hat{\tau}) \leq k^*(\bar{\tau})$ . Because  $k^*(\tau)$  is a nonincreasing function, we have  $k^*(\hat{\tau}) \geq k^*(\bar{\tau})$ . Thus  $k^*(\hat{\tau}) = k^*(\bar{\tau}) = 0$ . Since  $k^*(\hat{\tau}) = 0$ , the first constraint in the problem  $RS(\hat{\tau})$  indicates that  $\inf_{\mathbf{x} \in \mathcal{X}} \sup_{\mathbf{z} \in \mathcal{Z}} f(\mathbf{x}, \mathbf{z}) \leq \hat{\tau}$ . So we have  $\inf_{\mathbf{x} \in \mathcal{X}} \sup_{\mathbf{z} \in \mathcal{Z}} f(\mathbf{x}, \mathbf{z}) \leq \hat{\tau} < \bar{\tau}$ , which contradicts the assumption.

Hence we can get  $\theta^*$  by letting  $\theta^* = -\frac{1}{\alpha}$ , where  $\alpha \in \partial k^*(\tau_{rs})$ . We claim that  $\alpha < 0$ . Indeed,  $k^*(\tau) \geq k^*(\tau_{rs}) + \alpha(\tau - \tau_{rs})$  for any  $\tau \geq Z_0$  by the definition of subgradient. Because  $k^*(\tau)$  is a nonincreasing function, the inequality holds when  $\tau > \tau_{rs}$  only if  $\alpha \leq 0$ . Added with  $\alpha \neq 0$ , we get  $\alpha < 0$ . Then  $\theta^* > 0$ , which is meaningful. From the *Moreau-Rockafellar Theorem*[Rockafellar (1970), *Theorem 23.8*], it has  $\partial_\tau g(\tau_{rs}, \theta^*) = 1 + \theta^* \partial k^*(\tau_{rs})$  since  $\tau_{rs} \in \text{int}(\text{dom } k^*)$ . Therefore  $0 = 1 + \theta^* \alpha \in 1 + \theta^* \partial k^*(\tau_{rs}) = \partial_\tau g(\tau_{rs}, \theta^*)$ , where  $g(\tau, \theta^*) = \tau + k^*(\tau)\theta^*$ . Thus, we find the  $\theta^*$  to make  $\min_{\tau \geq Z_0} g(\tau, \theta^*)$  reach the minimum at  $\tau = \tau_{rs}$ . That is,  $DRO(\theta^*)$  and  $RS(\tau_{rs})$  share the same optimal solution.  $\square$

*Proof of Proposition 2* For any  $\theta \geq \bar{\theta}$ , the problem  $DRO(\theta)$  is always equivalent to  $\min_{\mathbf{x} \in \mathcal{X}} \sup_{\mathbf{z} \in \mathcal{Z}} f(\mathbf{x}, \mathbf{z})$ .

When  $\tau > \bar{\tau}$ , from latter part of the proof for Theorem 1, we already know that the problem  $RS(\tau)$  presents

$$\begin{aligned} \min_{\mathbf{x} \in \mathcal{X}} \quad & 0 \\ \text{s.t.} \quad & \sup_{\mathbf{z} \in \mathcal{Z}} f(\mathbf{x}, \mathbf{z}) \leq \tau \end{aligned}$$

The optimal solution  $\mathbf{x}^*$  to the problem  $DRO(\theta)$ ,  $\mathbf{x}^* \in \arg \inf_{\mathbf{x} \in \mathcal{X}} \sup_{\mathbf{z} \in \mathcal{Z}} f(\mathbf{x}, \mathbf{z})$ , is also optimal to the problem  $RS(\tau)$  since the constraint  $\sup_{\mathbf{z} \in \mathcal{Z}} f(\mathbf{x}^*, \mathbf{z}) = \bar{\tau} \leq \tau$  holds. Thus, derive the conclusion.  $\square$

*Proof of Corollary 1* Because  $f(\mathbf{x}, \mathbf{z})$  is linear, and  $\mathcal{Z}$  is a polyhedron, from Theorem 1 we just need to get  $\alpha^*$  from the dual problem of  $RS(\tau)$ .

Let us reformulate  $RS(\tau)$  as

$$\begin{aligned} \min \quad & k \\ \text{s.t.} \quad & \frac{1}{S} \sum_{s \in [S]} \beta_s \leq \tau \\ & f(\mathbf{x}, \mathbf{z}) - k\rho(\mathbf{z}, \hat{\mathbf{z}}_s) \leq \beta_s \quad \forall \mathbf{z} \in \mathcal{Z}, s \in [S] \\ & \mathbf{x} \in \mathcal{X} \end{aligned}$$

Substituting  $f(\mathbf{x}, \mathbf{z}) = \mathbf{x}^T \mathbf{z}$  and  $\rho(\mathbf{z}, \hat{\mathbf{z}}_s) = \|\mathbf{z} - \hat{\mathbf{z}}_s\|_1$ ,  $\mathcal{Z} = \{\mathbf{z} | A\mathbf{z} \geq \mathbf{b}\}$ ,  $\mathcal{X} = \{\mathbf{x} | C\mathbf{x} \leq \mathbf{h}\}$ , we get the robust counterpart of the second constraint.

$$\begin{aligned} (\mathbf{x}^T + \boldsymbol{\rho}_s^T A) \hat{\mathbf{z}}_s - \boldsymbol{\rho}_s^T \mathbf{b} &\leq \beta_s \quad \forall s \in [S] \\ \|\mathbf{x} + A^T \boldsymbol{\rho}_s\|_\infty &\leq k \quad \forall s \in [S] \end{aligned}$$

where  $\boldsymbol{\rho}_s, \forall s \in [S]$  are the dual variables for the support set  $\mathcal{Z}$ .

Then taking the dual variables  $\boldsymbol{\alpha}, \boldsymbol{\gamma}, \boldsymbol{\phi}, \boldsymbol{\varphi}$  for the constraints, the dual problem is derived as follows,

$$\begin{aligned} & \max_{\boldsymbol{\alpha} \leq 0, (\boldsymbol{\gamma}, \boldsymbol{\phi}^1, \boldsymbol{\phi}^2, \boldsymbol{\varphi}) \geq 0} \alpha \tau - \boldsymbol{\varphi}^T \mathbf{h} \\ & \text{s.t.} \quad \sum_{s \in [S]} \mathbf{1}^T (\boldsymbol{\phi}_s^1 + \boldsymbol{\phi}_s^2) \leq 1 \\ & \quad \frac{\alpha}{S} + \gamma_s = 0 \quad \forall s \in [S] \\ & \quad \sum_{s \in [S]} (\gamma_s \hat{\mathbf{z}}_s + \boldsymbol{\phi}_s^1 - \boldsymbol{\phi}_s^2) + C^T \boldsymbol{\varphi} = 0 \\ & \quad A(\gamma_s \hat{\mathbf{z}}_s + \boldsymbol{\phi}_s^1 - \boldsymbol{\phi}_s^2) - \gamma_s \mathbf{b} \geq 0 \quad \forall s \in [S] \end{aligned}$$

Then eliminating variables  $\gamma_s, \forall s \in [S]$ , the dual problem can be rewritten as

$$\begin{aligned} & \max_{\boldsymbol{\alpha} \leq 0, (\boldsymbol{\phi}^1, \boldsymbol{\phi}^2, \boldsymbol{\varphi}) \geq 0} \alpha \tau - \boldsymbol{\varphi}^T \mathbf{h} \\ & \text{s.t.} \quad \sum_{s \in [S]} \mathbf{1}^T (\boldsymbol{\phi}_s^1 + \boldsymbol{\phi}_s^2) \leq 1 \\ & \quad \sum_{s \in [S]} (\boldsymbol{\phi}_s^1 - \boldsymbol{\phi}_s^2 - \frac{\alpha}{S} \hat{\mathbf{z}}_s) + C^T \boldsymbol{\varphi} = 0 \\ & \quad A(\boldsymbol{\phi}_s^1 - \boldsymbol{\phi}_s^2 - \frac{\alpha}{S} \hat{\mathbf{z}}_s) + \frac{\alpha}{S} \mathbf{b} \geq 0 \quad \forall s \in [S] \end{aligned}$$

□

*Proof of Theorem 2* First, for any  $\theta$ , if  $(\tau^*, k^*, x^*, y_1^*(z, u), \dots, y_S^*(z, u))$  is the optimal solution to the problem  $DRO-LDR(\theta)$ , then  $(k^*, x^*, y_1^*(z, u), \dots, y_S^*(z, u))$  will also be the optimal solution to the problem  $RS-LDR(\tau^*)$ , since the constraints in both models are the same. Next, if we fix  $\tau_{rs}$  for the problem  $RS-LDR(\tau)$ , we try to find a corresponding  $\theta^*$  so that the two models share the same optimal solution. We can represent  $DRO-LDR(\theta)$  as  $\min_{\tau \geq \underline{\tau}} \tau + k^*(\tau)\theta$  where  $k^*(\tau)$  represents the optimal value of the variable  $k$  in the problem  $RS-LDR(\tau)$  and  $\underline{\tau}$  denoting the smallest  $\tau$  making the problem feasible.

$k^*(\tau)$  is convex. For any  $\tau_1, \tau_2$ , let  $(k_1, x_1, y_1^1(z, u), \dots, y_S^1(z, u))$  and  $(k_2, x_2, y_1^2(z, u), \dots, y_S^2(z, u))$  be the optimal solution to the problem  $RS-LDR(\tau_1)$  and  $RS-LDR(\tau_2)$  respectively. We claim that  $(\lambda k_1 + (1 - \lambda)k_2, \lambda x_1 + (1 - \lambda)x_2, \lambda y_1^1(z, u) + (1 - \lambda)y_1^2(z, u), \dots, \lambda y_S^1(z, u) + (1 - \lambda)y_S^2(z, u))$  where  $\lambda \in [0, 1]$  is a feasible solution of the problem  $RS-LDR(\lambda\tau_1 + (1 - \lambda)\tau_2)$ . Firstly,  $\lambda x_1 + (1 - \lambda)x_2 \in \mathcal{X}$  since  $\mathcal{X}$  is convex and  $\lambda y_s^1(z, u) + (1 - \lambda)y_s^2(z, u) \in \mathcal{L}^{m+1, P}, \forall s \in [S]$  since linear operation didn't change its linearity. Secondly, we have

$$\begin{aligned} & A(z)(\lambda x_1 + (1 - \lambda)x_2) + B(\lambda y_s^1(z, u) + (1 - \lambda)y_s^2(z, u)) \\ & = \lambda(A(z)x_1 + B y_s^1(z, u)) + (1 - \lambda)(A(z)x_2 + B y_s^2(z, u)) \\ & \geq \lambda b(z) + (1 - \lambda)b(z) = b(z) \quad \forall (z, u) \in \bar{\mathcal{Z}}_s, s \in [S] \end{aligned}$$

And last, we have

$$\begin{aligned} & \frac{1}{S} \sum_{s \in [S]} \sup_{(z, u) \in \bar{\mathcal{Z}}_s} \{ \mathbf{c}(z)^T (\lambda x_1 + (1 - \lambda)x_2) + \mathbf{d}^T (\lambda y_s^1(z, u) + (1 - \lambda)y_s^2(z, u)) - (\lambda k_1 + (1 - \lambda)k_2)u \} \\ & = \frac{1}{S} \sum_{s \in [S]} \sup_{(z, u) \in \bar{\mathcal{Z}}_s} \{ \lambda (\mathbf{c}(z)^T x_1 + \mathbf{d}^T y_s^1(z, u) - k_1 u) + (1 - \lambda) (\mathbf{c}(z)^T x_2 + \mathbf{d}^T y_s^2(z, u) - k_2 u) \} \\ & \leq \lambda \frac{1}{S} \sum_{s \in [S]} \sup_{(z, u) \in \bar{\mathcal{Z}}_s} \{ \mathbf{c}(z)^T x_1 + \mathbf{d}^T y_s^1(z, u) - k_1 u \} + (1 - \lambda) \frac{1}{S} \sum_{s \in [S]} \sup_{(z, u) \in \bar{\mathcal{Z}}_s} \{ \mathbf{c}(z)^T x_2 + \mathbf{d}^T y_s^2(z, u) - k_2 u \} \\ & \leq \lambda \tau_1 + (1 - \lambda) \tau_2 \end{aligned}$$

Then we have that  $k^*(\lambda\tau_1 + (1-\lambda)\tau_2) \leq \lambda k^*(\tau_1) + (1-\lambda)k^*(\tau_2)$ , i.e.  $k^*(\tau)$  is convex.

If  $\tau_{rs} = \underline{\tau}$ , we claim that  $RS-LDR(\underline{\tau})$  share the same optimal solution with  $DRO-LDR(0)$ . First, the optimal value of the problem  $DRO-LDR(0)$  is just  $\underline{\tau}$  since  $DRO-LDR(0)$  takes the same formulation as the definition of  $\underline{\tau}$ . And we denote its optimal solution as  $(\mathbf{x}^*, \mathbf{y}_1^*(\mathbf{z}, u), \dots, \mathbf{y}_S^*(\mathbf{z}, u))$ . Next, for the problem  $RS-LDR(\underline{\tau})$ , we have that for every  $(\mathbf{x}, \mathbf{y}_1(\mathbf{z}, u), \dots, \mathbf{y}_S(\mathbf{z}, u)) \in \bar{\mathcal{X}}$ , the following inequality holds

$$\frac{1}{S} \sum_{s \in [S]} \sup_{(z, u) \in \bar{\mathcal{Z}}_s} \{\mathbf{c}^T \mathbf{x} + \mathbf{d}^T \mathbf{y}_s(\mathbf{z}, u) - ku\} \geq \underline{\tau}$$

where the equality holds if and only if it takes the solution  $(\mathbf{x}^*, \mathbf{y}_1^*(\mathbf{z}, u), \dots, \mathbf{y}_S^*(\mathbf{z}, u))$  since the definition of  $\underline{\tau}$ . Thus  $(\mathbf{x}^*, \mathbf{y}_1^*(\mathbf{z}, u), \dots, \mathbf{y}_S^*(\mathbf{z}, u))$  is also the optimal solution to the problem  $RS-LDR(\underline{\tau})$ .

If  $\tau_{rs} \in (\underline{\tau}, \bar{\tau})$ , we know that  $k^*(\tau_{rs})$  must be finite since there exist feasible solutions of  $RS-LDR(\tau_{rs})$  whenever  $\tau_{rs} \geq \underline{\tau}$ . In addition,  $\tau_{rs} \in \text{int}(\text{dom } k^*)$ , so we have that  $\partial k^*(\tau_{rs})$  is nonempty and bounded from convex analysis.

Next we show that  $0 \notin \partial k^*(\tau_{rs})$  if  $\tau_{rs} \in (\underline{\tau}, \bar{\tau})$ . If not, there exists  $\hat{\tau} \in (\underline{\tau}, \bar{\tau})$  such that  $0 \in \partial k^*(\hat{\tau})$ . Then  $\hat{\tau}$  is the minimizer of  $k^*(\tau)$  and  $k^*(\tau) = 0$  for every  $\tau \geq \hat{\tau}$  since  $k^*(\tau)$  is a nonincreasing function and  $k^*(\bar{\tau}) = 0$ . Then we have

$$\inf_{(x, y_1(z, u), \dots, y_S(z, u)) \in \bar{\mathcal{X}}} \frac{1}{S} \sum_{s \in [S]} \sup_{(z, u) \in \bar{\mathcal{Z}}_s} \{\mathbf{c}^T \mathbf{x} + \mathbf{d}^T \mathbf{y}_s(\mathbf{z}, u)\} \leq \hat{\tau} < \bar{\tau}$$

which is contradict to the assumption.

Hence when  $\tau_{rs} \in (\underline{\tau}, \bar{\tau})$ , we can get  $\theta^*$  by letting  $\theta^* = -\frac{1}{\alpha}$ , where  $\alpha \in \partial k^*(\tau_{rs})$ . Therefore it has  $0 = 1 + \theta^* \alpha \in 1 + \theta^* \partial k^*(\tau_{rs}) = \partial(\tau + k^*(\tau_{rs})\theta^*)$ . Thus, we find the  $\theta^*$  which makes the problem  $\min_{\tau \geq Z_0} \tau + k^*(\tau)\theta^*$  take the optimal solution with  $\tau = \tau_{rs}$ .

If  $\tau_{rs} = \bar{\tau}$ , we have  $k^*(\tau_{rs}) = 0$  since the constraints hold when  $k(\tau_{rs}) = 0$ . So the problem  $RS(\bar{\tau})$  becomes

$$\begin{aligned} \min_{(x, y_1(z, u), \dots, y_S(z, u)) \in \bar{\mathcal{X}}} & 0 \\ \text{s.t.} & \frac{1}{S} \sum_{s \in [S]} \sup_{(z, u) \in \bar{\mathcal{Z}}_s} \{\mathbf{c}^T \mathbf{x} + \mathbf{d}^T \mathbf{y}_s(\mathbf{z}, u)\} \leq \bar{\tau} \end{aligned}$$

While the problem  $DRO-LDR(\bar{\theta})$  becomes

$$\begin{aligned} \min & \frac{1}{S} \sum_{s \in [S]} \sup_{(z, u) \in \bar{\mathcal{Z}}_s} \{\mathbf{c}^T \mathbf{x} + \mathbf{d}^T \mathbf{y}_s(\mathbf{z}, u)\} \\ \text{s.t.} & (x, y_1(z, u), \dots, y_S(z, u)) \in \bar{\mathcal{X}} \end{aligned}$$

Both problems have the same optimal solutions, i.e.,

$$(\mathbf{x}^*, \mathbf{y}_1(\mathbf{z}, u), \dots, \mathbf{y}_S(\mathbf{z}, u)) \in \arg \inf_{(x, y_1(z, u), \dots, y_S(z, u)) \in \bar{\mathcal{X}}} \frac{1}{S} \sum_{s \in [S]} \sup_{(z, u) \in \bar{\mathcal{Z}}_s} \{\mathbf{c}^T \mathbf{x} + \mathbf{d}^T \mathbf{y}_s(\mathbf{z}, u)\}.$$

□

*Proof of Theorem 3* Suppose that the optimal solution of the GRS problem  $GRS(\tau', \theta')$  is denoted as  $(\mathbf{x}^*, k^*, \eta^*)$ . We claim that there exists a solution where  $\eta^* = k^*$ . To prove this, we consider two cases:

1. If  $\eta^* < k^*$ , selecting a smaller value of  $k$  equal to  $\eta^*$  would not change the left-hand side value of the first constraint, so it still holds. However, the objective value would become smaller, contradicting the assumption of optimality.

2. If  $\eta^* > k^*$ , reducing  $\eta^*$  to  $k^*$  would decrease the left-hand side value of the first constraint. Despite this reduction, the constraint would still hold, and the optimal value would remain the same.

Therefore, we can replace  $\eta$  with  $k$  and reformulate  $GRS(\tau', \theta')$  into the following problem:

$$\begin{aligned} \min \quad & k \\ \text{s.t.} \quad & \frac{1}{S} \sum_{s \in [S]} \sup_{z \in \mathcal{Z}} \{f(\mathbf{x}, z) - k\rho(z, \hat{z}_s)\} \leq \tau' - k\theta', \\ & x \in \mathcal{X}, \\ & k \geq 0. \end{aligned}$$

Suppose that its optimal solution is denoted as  $(\mathbf{x}^*, k^*)$ . We claim that the optimal value of  $RS(\tau - k^*\theta')$  will be  $k^*$ . We can easily show that  $(\mathbf{x}^*, k^*)$  is a feasible solution of  $RS(\tau' - k^*\theta')$ .

Now, let's assume that the optimal solution of  $RS(\tau' - k^*\theta')$  is denoted as  $(\bar{\mathbf{x}}, \bar{k})$ . Then  $\bar{k}$  is not smaller than  $k^*$ . Suppose the contrary, that  $\bar{k} < k^*$ , then we have  $\frac{1}{S} \sum_{s \in [S]} \sup_{z \in \mathcal{Z}} \{f(\bar{\mathbf{x}}, z) - \bar{k}\rho(z, \hat{z}_s)\} \leq \tau' - k^*\theta'$ . This inequality implies that  $\frac{1}{S} \sum_{s \in [S]} \sup_{z \in \mathcal{Z}} \{f(\bar{\mathbf{x}}, z) - \bar{k}\rho(z, \hat{z}_s)\} \leq \tau' - \bar{k}\theta'$ . Therefore,  $\bar{k}$  would be a feasible solution of  $GRS(\tau', \theta')$ , which contradicts the assumption that  $k^*$  is the optimal solution of the GRS problem.

Hence,  $(\mathbf{x}^*, k^*)$  is also the optimal solution of  $RS(\tau' - k^*\theta')$ , indicating that it has the same optimal solution as  $GRS(\tau', \theta')$ .

The other direction is trivial, since when  $\theta' = 0$ , problem  $GRS(\tau, 0)$  reduces to  $RS(\tau)$ .  $\square$

*Proof of Theorem 4* We first rewrite the two problems. Problem  $DRO(\theta)$  can be rewritten as  $\min_{\mathbf{x} \in \mathcal{X}, k \geq 0} \frac{1}{S} \sum_{s \in [S]} \sup_{z \in \mathcal{Z}} \{f(\mathbf{x}, z) - k\rho(z, \hat{z}_s)\} + k\theta$ . Problem  $GDRC(k', \theta')$  can be reformulated as  $\min_{\mathbf{x} \in \mathcal{X}, 0 \leq k \leq k'} \frac{1}{S} \sum_{s \in [S]} \sup_{z \in \mathcal{Z}} \{f(\mathbf{x}, z) - k\rho(z, \hat{z}_s)\} + k\theta$ . The two formulations are almost identical except for the range on  $k$  in GDRC. Define a function  $h(\mathbf{x}, k) := \frac{1}{S} \sum_{s \in [S]} \sup_{z \in \mathcal{Z}} \{f(\mathbf{x}, z) - k\rho(z, \hat{z}_s)\}$ , then Problem  $DRO(\theta)$  is  $\min_{\mathbf{x} \in \mathcal{X}, k \geq 0} h(\mathbf{x}, k) + k\theta$  and Problem  $GDRC(k', \theta')$  is  $\min_{\mathbf{x} \in \mathcal{X}, 0 \leq k \leq k'} h(\mathbf{x}, k) + k\theta$ . Note that the function  $h(\mathbf{x}, k)$  is convex since it is the point-wise maximization on  $f(\mathbf{x}, z)$ .

We start from the easy direction. For a fixed  $\theta$ , suppose  $(\mathbf{x}^*, k^*)$  is an optimal solution to Problem  $DRO(\theta)$ . Let  $k' = k^*, \theta' = \theta$ , then  $(\mathbf{x}^*, k^*)$  is also a optimal solution to Problem  $GDRC(k^*, \theta)$  since the constraint  $k \leq k^*$  allows  $k$  takes value  $k^*$ .

Let us prove the other direction. For a fixed  $(k', \theta')$ , suppose  $(\mathbf{x}^*, k^*)$  is an optimal solution to Problem  $GDRC(k', \theta')$ . If  $k^* < k'$ , then let  $\theta = \theta'$  and we have that  $(\mathbf{x}^*, k^*)$  is also an optimal solution to Problem  $DRO(\theta')$ . If not, we could find a smaller solution to Problem  $GDRC(k', \theta')$  since it is convex, which is contradictory to the assumption. If  $k^* = k'$ , from the first order optimality condition, we have  $0 \in \partial_{\mathbf{x}} h(\mathbf{x}^*, k') + \mathcal{N}_{\mathcal{X}}(\mathbf{x}^*)$ , where  $\mathcal{N}_{\mathcal{X}}(\mathbf{x}^*)$  is the normal cone to  $\mathcal{X}$  at the point  $\mathbf{x}^*$ . Then take some  $\theta \in -\partial_{\mathbf{x}} h(\mathbf{x}^*, k')$ , the solution  $(\mathbf{x}^*, k')$  will be optimal to Problem  $DRO(\theta)$ . Since the Problem  $DRO(\theta)$  is convex, we just need to prove that  $0 \in \partial\{h(\mathbf{x}^*, k') + k'\theta\} + (\mathcal{N}_{\mathcal{X}}(\mathbf{x}^*), 0)$ . Since the function  $f(\mathbf{x}, z)$  is convex on  $\mathbf{x}$  and continuous on  $z$ , and the metric  $\rho$  is continuous on  $z$ , according to [Shapiro et al. (2021), Theorem 7.26], we have

$$\begin{aligned} \partial\{h(\mathbf{x}, k) + k\theta\} &= \frac{1}{S} \sum_{s \in [S]} \text{conv} \left\{ \bigcup_{z \in \bar{\mathcal{Z}}_s(\mathbf{x}, k)} \{\partial\{f(\mathbf{x}, z) - k\rho(z, \hat{z}_s)\}\} \right\} + \partial(k\theta) \\ &= \frac{1}{S} \sum_{s \in [S]} \text{conv} \left\{ \bigcup_{z \in \bar{\mathcal{Z}}_s(\mathbf{x}, k)} \{(\partial_{\mathbf{x}} f(\mathbf{x}, z), -\partial_k k\rho(z, \hat{z}_s))\} \right\} + (\mathbf{0}, \theta) \end{aligned}$$

where  $\bar{Z}_s(\mathbf{x}, k) := \arg \max_{z \in \mathcal{Z}} \{f(\mathbf{x}, z) - k\rho(z, \hat{z}_s)\}$  is the optimal solution set on  $z$ . Similarly, we have  $\partial_{\mathbf{x}} h(\mathbf{x}, k) = \frac{1}{S} \sum_{s \in [S]} \text{conv} \{ \cup_{z \in \bar{Z}_s(\mathbf{x}, k)} \{ \partial_{\mathbf{x}} f(\mathbf{x}, z) \} \}$  and  $\partial_k h(\mathbf{x}, k) = \frac{1}{S} \sum_{s \in [S]} \text{conv} \{ \cup_{z \in \bar{Z}_s(\mathbf{x}, k)} \{ -\partial_k k\rho(z) \} \}$ . Thus, we derive that

$$\partial\{h(\mathbf{x}^*, k') + k'\theta\} = (\partial_{\mathbf{x}} h(\mathbf{x}^*, k'), \partial_k h(\mathbf{x}^*, k')) + (\mathbf{0}, \theta) = (\partial_{\mathbf{x}} h(\mathbf{x}^*, k'), \partial_k h(\mathbf{x}^*, k') + \theta),$$

which indicates that  $0 \in \partial\{h(\mathbf{x}^*, k') + k'\theta\} + (\mathcal{N}_{\mathcal{X}}(\mathbf{x}^*), 0)$ .  $\square$

*Proof of Theorem 5* We start by proving one direction. For a fixed  $\bar{k}$  and  $\theta'$ , suppose an optimal solution to the problem  $GDRC(\bar{k}, \theta')$  is  $(\bar{\mathbf{x}}, \bar{\tau}, \bar{\eta})$ . We claim that the optimal solution of problem  $GRS(\bar{\tau}, \theta')$  is also optimal to problem  $GDRC(\bar{k}, \theta')$ .

First,  $(\bar{\mathbf{x}}, \bar{k}, \bar{\eta})$  is a feasible solution to the problem  $GRS(\bar{\tau}, \theta')$ . Suppose an optimal solution to problem  $GRS(\bar{\tau}, \theta')$  is  $(\mathbf{x}^*, k^*, \eta^*)$ . Then we have  $k^* \leq \bar{k}$ .

If  $k^* = \bar{k}$ , then  $(\mathbf{x}^*, \bar{\tau}, \eta^*)$  is a feasible solution and thus an optimal solution to problem  $GDRC(\bar{k}, \theta')$ .

If  $k^* < \bar{k}$ . Suppose the optimal value of the problem  $GDRC(k^*, \theta')$  is  $\tau_c^*$ , then  $\tau_c^* \geq \bar{\tau}$  since the optimal value of  $GDRC(k, \theta')$  is non-increasing in  $k$ . If  $\tau_c^* = \bar{\tau}$ , then  $(\mathbf{x}^*, \tau_c^*, \eta^*)$  is an optimal solution to the problem  $GDRC(k^*, \theta')$  since the constraint holds, and the optimal value is obtained. At the same time,  $(\mathbf{x}^*, \tau_c^*, \eta^*)$  is also an optimal solution to the problem  $GDRC(\bar{k}, \theta')$ , since the following inequality holds:

$$\begin{aligned} & \theta' \eta^* + \frac{1}{S} \sum_{s \in [S]} \sup_{z \in \mathcal{Z}} \{f(\mathbf{x}^*, z) - \min\{\bar{k}, \eta^*\} \rho(z, \hat{z}_s)\} \\ & \leq \theta' \eta^* + \frac{1}{S} \sum_{s \in [S]} \sup_{z \in \mathcal{Z}} \{f(\mathbf{x}^*, z) - \min\{k^*, \eta^*\} \rho(z, \hat{z}_s)\} \leq \bar{\tau} \end{aligned}$$

Thus, both problems  $GDRC(\bar{k}, \theta')$  and  $GRS(\bar{\tau}, \theta')$  have an optimal solution  $\mathbf{x}^*$ . If problem  $GDRC(\bar{k}, \theta')$  has a unique optimal solution, we have  $\mathbf{x}^* = \bar{\mathbf{x}}$ .

If  $\tau_c^* > \bar{\tau}$ , then  $(\mathbf{x}^*, \bar{\tau}, \eta^*)$  is not a feasible solution to problem  $GDRC(k^*, \theta')$ , and we have  $\theta' \eta^* + \frac{1}{S} \sum_{s \in [S]} \sup_{z \in \mathcal{Z}} \{f(\mathbf{x}^*, z) - \min\{k^*, \eta^*\} \rho(z, \hat{z}_s)\} > \bar{\tau}$ , which contradicts the assumption that  $(\mathbf{x}^*, k^*, \eta^*)$  is an optimal solution to the problem  $GRS(\bar{\tau}, \theta')$ .

Next, let's prove the other direction. For a fixed  $\hat{\tau}$  and  $\theta'$ , suppose the problem  $GRS(\hat{\tau}, \theta')$  has an optimal solution  $(\hat{\mathbf{x}}, \hat{k}, \hat{\eta})$ . We claim that the optimal solution to problem  $GDRC(\hat{k}, \theta')$  is also optimal to problem  $GRS(\hat{\tau}, \theta')$ .

First, it is easy to show that  $(\hat{\mathbf{x}}, \hat{\tau}, \hat{\eta})$  is a feasible solution to the problem  $GDRC(\hat{k}, \theta')$ . Suppose an optimal solution to problem  $GDRC(\hat{k}, \theta')$  is  $(\mathbf{x}^*, \tau^*, \eta^*)$ , then we have  $\tau^* \leq \hat{\tau}$ .

If  $\tau^* = \hat{\tau}$ , then  $(\mathbf{x}^*, \hat{k}, \eta^*)$  is a feasible solution and thus an optimal solution to problem  $GRS(\hat{\tau}, \theta')$ .

Suppose  $\tau^* < \hat{\tau}$  and the optimal value of the problem  $GRS(\tau^*, \theta')$  is  $k_s^*$ , then  $k_s^* \geq \hat{k}$  since the optimal value of  $GRS(\tau, \theta')$  is non-increasing in  $\tau$ . If  $k_s^* = \hat{k}$ ,  $(\mathbf{x}^*, \hat{k}, \eta^*)$  is an optimal solution to the problem  $GRS(\tau^*, \theta')$ . Since  $(\mathbf{x}^*, \tau^*, \eta^*)$  is an optimal solution to the problem  $GDRC(\hat{k}, \theta')$ , we have the following inequality:  $\theta' \eta^* + \frac{1}{S} \sum_{s \in [S]} \sup_{z \in \mathcal{Z}} \{f(\mathbf{x}^*, z) - \min\{\hat{k}, \eta^*\} \rho(z, \hat{z}_s)\} \leq \tau^*$ , which means that  $(\mathbf{x}^*, \hat{k}, \eta^*)$  is a feasible and optimal solution of the problem  $GRS(\tau^*, \theta')$ . Similarly, we have  $(\mathbf{x}^*, \hat{k}, \eta^*)$  is a feasible and optimal solution to the problem  $GRS(\hat{\tau}, \theta')$ . Thus, both problems  $GRS(\hat{\tau}, \theta')$  and  $GDRC(\hat{k}, \theta')$  have the same optimal solution  $\mathbf{x}^*$ . If problem  $GRS(\hat{\tau}, \theta')$  has a unique optimal solution, we have  $\mathbf{x}^* = \hat{\mathbf{x}}$ .

If  $k_s^* > \hat{k}$ , then  $(\mathbf{x}^*, \hat{k}, \eta^*)$  is not a feasible solution to problem  $GRS(\tau^*, \theta')$ , and we have  $\theta' \eta^* + \frac{1}{S} \sum_{s \in [S]} \sup_{z \in \mathcal{Z}} \{f(\mathbf{x}^*, z) - \min\{\hat{k}, \eta^*\} \rho(z, \hat{z}_s)\} > \tau^*$ . Meanwhile, from the assumption that  $(\mathbf{x}^*, \tau^*, \eta^*)$  is an optimal solution of the problem  $GDRG(\hat{k}, \theta')$ , we have  $\theta' \eta^* + \frac{1}{S} \sum_{s \in [S]} \sup_{z \in \mathcal{Z}} \{f(\mathbf{x}^*, z) - \min\{\hat{k}, \eta^*\} \rho(z, \hat{z}_s)\} \leq \tau^*$ , which leads to a contradiction.  $\square$

*Proof of Proposition 3* Because of the nonincreasing and convexity of  $k^*(\tau)$  and  $0 \in \partial k^*(\tau_{rs})$ , we know that  $k^*(\tau) = k^*(\tau_{rs}), \forall \tau \geq \tau_{rs}$ . Thus, for any  $\tau \geq \tau_{rs}$ , the problem  $RS(\tau)$  has the same optimal solution. We just need to focus on the lowest  $\tau_{rs}$  such that  $0 \in \partial k^*(\tau_{rs})$ . For the problem  $DRO(\theta) = \min_{\tau \geq Z_0} k^*(\tau) \theta + \tau$ , we try to prove that when  $\theta \rightarrow \infty$ , the optimal solution is approaching  $\tau_{rs}$ . The optimal  $\tau$  of the problem  $DRO(\theta)$  must not larger than  $\tau_{rs}$  since  $k^*(\tau) + \tau = k^*(\tau_{rs}) + \tau > k^*(\tau_{rs}) + \tau_{rs}$  if  $\tau > \tau_{rs}$ . If the optimal  $\tau \in [Z_0, \tau_{rs})$ , just let  $\theta > \frac{\tau_{rs} - \tau}{k^*(\tau) - k^*(\tau_{rs})}$ . We have that  $k^*(\tau) \theta + \tau > k^*(\tau_{rs}) \theta + \tau_{rs}$  which is contradictory to the optimality of  $\tau$ . So when  $\theta$  is large enough, the optimal solution will approach  $\tau_{rs}$ .  $\square$

## B. Generalized $p$ -Wasserstein distance

We consider a generalized  $p$ -Wasserstein distance for  $p \geq 1$  as follows:

$$d_W(\mathbb{P}, \mathbb{P}^\dagger) = \inf_{(\tilde{z}, \tilde{z}^\dagger) \sim \mathbb{Q}} (\mathbb{E}_{\mathbb{Q}}[\rho(\tilde{z}, \tilde{z}^\dagger)^p])^{1/p}$$

$$s.t. \quad \prod_{\tilde{z}} \mathbb{Q} = \mathbb{P}$$

$$\prod_{\tilde{z}^\dagger} \mathbb{Q} = \mathbb{P}^\dagger.$$

Thus, the ambiguity set for the DRO model presents the following equivalent formulation:

$$\mathcal{F}(\theta) := \left\{ \mathbb{P} \in \mathcal{P}(\mathbb{R}^m) \left| \begin{array}{l} \tilde{z} \sim \mathbb{P} \\ \mathbb{P}(\tilde{z} \in \mathcal{Z}) = 1 \\ d_W(\mathbb{P}, \mathbb{P}^\dagger)^p \leq \theta^p \end{array} \right. \right\}.$$

Using a standard duality argument for DRO model, we obtain:

$$\min_{\mathbf{x} \in \mathcal{X}} \sup_{\mathbb{P} \in \mathcal{P}(\mathcal{Z})} \inf_{k \geq 0} \mathbb{E}_{\mathbb{P}} [f(\mathbf{x}, \tilde{z})] - k d_W(\mathbb{P}, \mathbb{P}^\dagger)^p + k \theta^p.$$

If  $f(x, z)$  is a measurable function in a Polish space  $(\mathcal{Z}, \rho)$ , the DRO model can be reformulated as the following problem by Gao and Kleywegt (2023):

$$\begin{aligned} \min \quad & \tau + k \theta^p \\ s.t. \quad & \frac{1}{S} \sum_{s \in [S]} \sup_{z \in \mathcal{Z}} \{f(\mathbf{x}, z) - k \rho(z, \hat{z}_s)^p\} \leq \tau \\ & x \in \mathcal{X}, k \geq 0. \end{aligned} \tag{DRO-p}$$

The corresponding RS model with generalized  $p$ -Wasserstein distance is as follows:

$$\begin{aligned} \min \quad & k \\ s.t. \quad & \mathbb{E}_{\mathbb{P}} [f(\mathbf{x}, \tilde{z})] - \tau \leq k d_W(\mathbb{P}, \mathbb{P}^\dagger)^p \quad \forall \mathbb{P} \in \mathcal{P}(\mathcal{Z}) \\ & x \in \mathcal{X}, k \geq 0. \end{aligned}$$

We can reformulate it as follows:

$$\begin{aligned} \kappa(\tau) := \min \quad & k \\ s.t. \quad & \frac{1}{S} \sum_{s \in [S]} \sup_{z \in \mathcal{Z}} \{f(\mathbf{x}, z) - k \rho(z, \hat{z}_s)^p\} \leq \tau \\ & x \in \mathcal{X}, k \geq 0. \end{aligned} \tag{RS-p}$$

Thus, following the same proof procedure, Proposition 1 and Theorem 1 continue to hold for Problem (DRO-p) and Problem (RS-p) with parameters  $\theta^p$  and  $\tau$  respectively.

### C. Example of a non-convex problem

EXAMPLE 3 (NON-CONVEX:A COMBINATORIAL OPTIMIZATION). Following the setup and results in Long et al. (2023), we give an example of the robust combinatorial model presenting in its equivalent reformulation:

$$\begin{aligned} \min \quad & -x_1 - x_2 + x_1(5.5 - k)^+ + x_2(7 - k)^+ + x_3(3 - k)^+ + k\theta \\ \text{s.t.} \quad & x_1 + x_2 + x_3 \geq 1 \\ & k \in \{0, 3, 5.5, 7\} \\ & x_1, x_2, x_3 \in \{0, 1\} \end{aligned}$$

The corresponding combinatorial robust satisficing model would be given by:

$$\begin{aligned} \min \quad & k \\ \text{s.t.} \quad & x_1 + x_2 + x_3 \geq 1 \\ & -x_1 - x_2 + x_1(5.5 - k)^+ + x_2(7 - k)^+ + x_3(3 - k)^+ \leq \tau \\ & k \geq 0 \\ & x_1, x_2, x_3 \in \{0, 1\} \end{aligned}$$

We will show that the two models do not share the same family of optimal solutions, due to the non-convexity of  $\mathcal{X}$ . In this case, the RS model has a broader solution family such that some optimal solution only obtained in RS model will not appear in the DRO model. It is easy to know that when  $\theta \in [0, 0.5]$ , the optimal solutions of the robust combinatorial model are  $x^* = (1, 1, 1)$  and  $x^* = (1, 1, 0)$ . When  $\theta > 0.5$ , the optimal solution will be  $x^* = (0, 0, 1)$ . There is no other optimal solution in the solution family of the robust combinatorial model. However, the combinatorial robust satisficing model owns an additional minimizer  $x^* = (1, 0, 1)$  when  $\tau \in (-1, 0)$ .

### D. Explicit Formulation in Lot-sizing

After the lifted affine recourse adaptation technique, the corresponding formulation of  $DRO-LDR(\theta)$  is as follows:

$$\begin{aligned} \min \quad & \mathbf{c}^T \mathbf{x} + k\theta + \frac{1}{S} \sum_{s \in [S]} \beta_s \\ \text{s.t.} \quad & \sum_{i \in [N]} \mathbf{d}_i^T \mathbf{y}_i^{(s)}(\mathbf{z}, u) + \mathbf{l}^T \mathbf{w}^{(s)}(\mathbf{z}, u) - ku \leq \beta_s \quad \forall (\mathbf{z}, u) \in \bar{\mathcal{Z}}_s, s \in [S] \\ & x_i + w_i^{(s)}(\mathbf{z}, u) + \sum_{j \in [N]} y_{ji}^{(s)}(\mathbf{z}, u) - \sum_{j \in [N]} y_{ij}^{(s)}(\mathbf{z}, u) - z_i \geq 0, \quad \forall (\mathbf{z}, u) \in \bar{\mathcal{Z}}_s, s \in [S], i \in [N] \\ & \mathbf{y}^{(s)}(\mathbf{z}, u) \geq \mathbf{0}, \mathbf{w}^{(s)}(\mathbf{z}, u) \geq \mathbf{0} \quad \forall (\mathbf{z}, u) \in \bar{\mathcal{Z}}_s, s \in [S] \\ & \mathbf{0} \leq \mathbf{x} \leq \bar{\boldsymbol{\delta}} \\ & \mathbf{y}^{(s)} \in \mathcal{L}^{(N+1, N \times N)}, \mathbf{w}^{(s)} \in \mathcal{L}^{(N+1, N)} \quad \forall s \in [S], \end{aligned}$$

where the lifted uncertainty support set under each empirical scenario  $s \in [S]$  is defined as  $\bar{\mathcal{Z}}_s := \{(\mathbf{z}, u) \in \mathcal{Z} \times R \mid \|\mathbf{z} - \hat{\mathbf{z}}_s\| \leq u\}$ .

The corresponding formulation of  $RS-LDR(\tau)$  is presented as follows,

$$\begin{aligned}
& \min && k \\
& \text{s.t.} && \mathbf{c}^T \mathbf{x} + \frac{1}{S} \sum_{s \in [S]} \beta_s - \tau \leq 0 \\
& && \sum_{i \in [N]} \mathbf{d}_i^T \mathbf{y}_i^{(s)}(\mathbf{z}, u) + \mathbf{l}^T \mathbf{w}^{(s)}(\mathbf{z}, u) - ku \leq \beta_s \quad \forall (\mathbf{z}, u) \in \bar{\mathcal{Z}}_s, s \in [S] \\
& && x_i + w_i^{(s)}(\mathbf{z}, u) + \sum_{j \in [N]} y_{ji}^{(s)}(\mathbf{z}, u) - \sum_{j \in [N]} y_{ij}^{(s)}(\mathbf{z}, u) - z_i \geq 0, \quad \forall (\mathbf{z}, u) \in \bar{\mathcal{Z}}_s, s \in [S], i \in [N] \\
& && \mathbf{y}^{(s)}(\mathbf{z}, u) \geq \mathbf{0}, \mathbf{w}^{(s)}(\mathbf{z}, u) \geq \mathbf{0} \quad \forall (\mathbf{z}, u) \in \bar{\mathcal{Z}}_s, s \in [S] \\
& && \mathbf{0} \leq \mathbf{x} \leq \bar{\boldsymbol{\delta}} \\
& && \mathbf{y}^{(s)} \in \mathcal{L}^{(N+1, N \times N)}, \mathbf{w}^{(s)} \in \mathcal{L}^{(N+1, N)} \quad \forall s \in [S].
\end{aligned}$$

## E. Reformulations and Specific Relationship in Portfolio

The DRO formulation is equivalent to:

$$\begin{aligned}
& \inf && k\theta + \frac{1}{S} \sum_{s \in [S]} \beta_s \\
& \text{s.t.} && \mathbf{C}\mathbf{x} \leq \mathbf{h} \\
& && \gamma t - \mathbf{x}^T \hat{\mathbf{z}}_s + \boldsymbol{\rho}_{s1}^T (\mathbf{A}\hat{\mathbf{z}}_s - \mathbf{b}) \leq \beta_s \quad \forall s \in [S] \\
& && (1 - \frac{1}{\epsilon})\gamma t - (1 + \frac{\gamma}{\epsilon})\mathbf{x}^T \hat{\mathbf{z}}_s + \boldsymbol{\rho}_{s2}^T (\mathbf{A}\hat{\mathbf{z}}_s - \mathbf{b}) \leq \beta_s \quad \forall s \in [S] \\
& && \|\mathbf{A}^T \boldsymbol{\rho}_{s1} - \mathbf{x}\|_2 \leq k \quad \forall s \in [S] \\
& && \|\mathbf{A}^T \boldsymbol{\rho}_{s2} - (1 + \frac{\gamma}{\epsilon})\mathbf{x}\|_2 \leq k \quad \forall s \in [S].
\end{aligned}$$

The RS formulation is equivalent to:

$$\begin{aligned}
& \inf && k \\
& \text{s.t.} && \mathbf{C}\mathbf{x} \leq \mathbf{h} \\
& && \frac{1}{S} \sum_{s \in [S]} \beta_s \leq \tau \\
& && \gamma t - \mathbf{x}^T \hat{\mathbf{z}}_s + \boldsymbol{\rho}_{s1}^T (\mathbf{A}\hat{\mathbf{z}}_s - \mathbf{b}) \leq \beta_s \quad \forall s \in [S] \\
& && (1 - \frac{1}{\epsilon})\gamma t - (1 + \frac{\gamma}{\epsilon})\mathbf{x}^T \hat{\mathbf{z}}_s + \boldsymbol{\rho}_{s2}^T (\mathbf{A}\hat{\mathbf{z}}_s - \mathbf{b}) \leq \beta_s \quad \forall s \in [S] \\
& && \|\mathbf{A}^T \boldsymbol{\rho}_{s1} - \mathbf{x}\|_2 \leq k \quad \forall s \in [S] \\
& && \|\mathbf{A}^T \boldsymbol{\rho}_{s2} - (1 + \frac{\gamma}{\epsilon})\mathbf{x}\|_2 \leq k \quad \forall s \in [S].
\end{aligned}$$

Introducing the dual variables  $\alpha, \boldsymbol{\varphi}, \lambda_s^1, \lambda_s^2, \boldsymbol{\phi}_s^1, \boldsymbol{\phi}_s^2, \boldsymbol{\phi}_s^3, \boldsymbol{\phi}_s^4, \forall s \in [S]$ , we get the dual problem of the RS as follows:

$$\begin{aligned}
& \max_{\alpha \leq 0} && -\boldsymbol{\varphi}^T \boldsymbol{h} + \alpha \tau \\
& \text{s.t.} && \sum_{s \in [S]} (\boldsymbol{\phi}_s^2 + \boldsymbol{\phi}_s^4) \leq 1 \\
& && \lambda_s^1 + \lambda_s^2 + \frac{\alpha}{S} = 0 \quad \forall s \in [S] \\
& && \sum_{s \in [S]} [\lambda_s^1 + (1 - \frac{1}{\epsilon}) \lambda_s^2] = 0 \\
& && \boldsymbol{C}^T \boldsymbol{\varphi} + \sum_{s \in [S]} [-\lambda_s^1 \hat{\boldsymbol{z}}_s - (1 + \frac{\gamma}{\epsilon}) \lambda_s^2 \hat{\boldsymbol{z}}_s + \boldsymbol{\phi}_s^1 + (1 + \frac{\gamma}{\epsilon}) \boldsymbol{\phi}_s^3] \geq 0 \\
& && \lambda_s^1 (\boldsymbol{A} \hat{\boldsymbol{z}}_s - \boldsymbol{b}) - \boldsymbol{A} \boldsymbol{\phi}_s^1 \geq 0 \quad \forall s \in [S] \\
& && \lambda_s^2 (\boldsymbol{A} \hat{\boldsymbol{z}}_s - \boldsymbol{b}) - \boldsymbol{A} \boldsymbol{\phi}_s^3 \geq 0 \quad \forall s \in [S] \\
& && \|\boldsymbol{\phi}_s^1\|_2 \leq \boldsymbol{\phi}_s^2 \quad \forall s \in [S] \\
& && \|\boldsymbol{\phi}_s^3\|_2 \leq \boldsymbol{\phi}_s^4 \quad \forall s \in [S].
\end{aligned}$$

Therefore, based on Theorem 1, we can derive the corresponding  $\theta^* = -\frac{1}{\alpha^*}$ , where  $\alpha^*$  is the optimal solution to the dual problem of the RS.
